# Supplementary material for: Unexpected in crystallo reactivity of the potential drug bis(maltolato)oxidovanadium(iv) with lysozyme
Source: Royal Society of Chemistry journal article supplement (doi:10.1039/d4qi01528b), 2024-01-01
Supplement: d4qi01528b1.pdf [file d4qi01528b1.pdf]

## Supporting information

### Unexpected In Crystallo Reactivity of the Potential Drug Bis(maltolato)oxidovanadium(IV) with Lysozyme

Maddalena Paolillo,<sup>a</sup> Giarita Ferraro,<sup>a</sup> Irene Cipollone,<sup>a</sup> Eugenio Garribba,<sup>b</sup> Maria Monti,<sup>\*a</sup> and Antonello Merlino<sup>\*a</sup>

---

<sup>a.</sup> *Department of Chemical Sciences, University of Naples Federico II, Complesso Universitario di Monte Sant'Angelo, Via Cintia, I-80126, Napoli, Italy. E-mail: montimar@unina.it; antonello.merlino@unina.it.*

<sup>b.</sup> *Dipartimento di Medicina, Chirurgia e Farmacia, Università di Sassari, Viale San Pietro, I-07100 Sassari, Italy.*

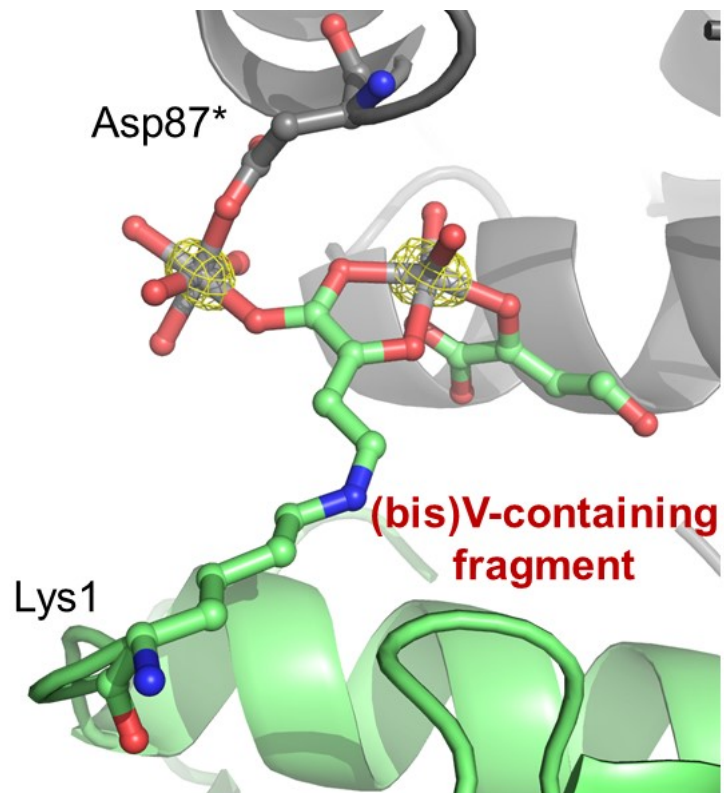

**Figure S1** Anomalous difference electron density map (at 3.0  $\sigma$  level) of the (bis)V-containing fragment. Atoms from a symmetry related molecule are highlighted with the asterisk (\*) and coloured in grey.

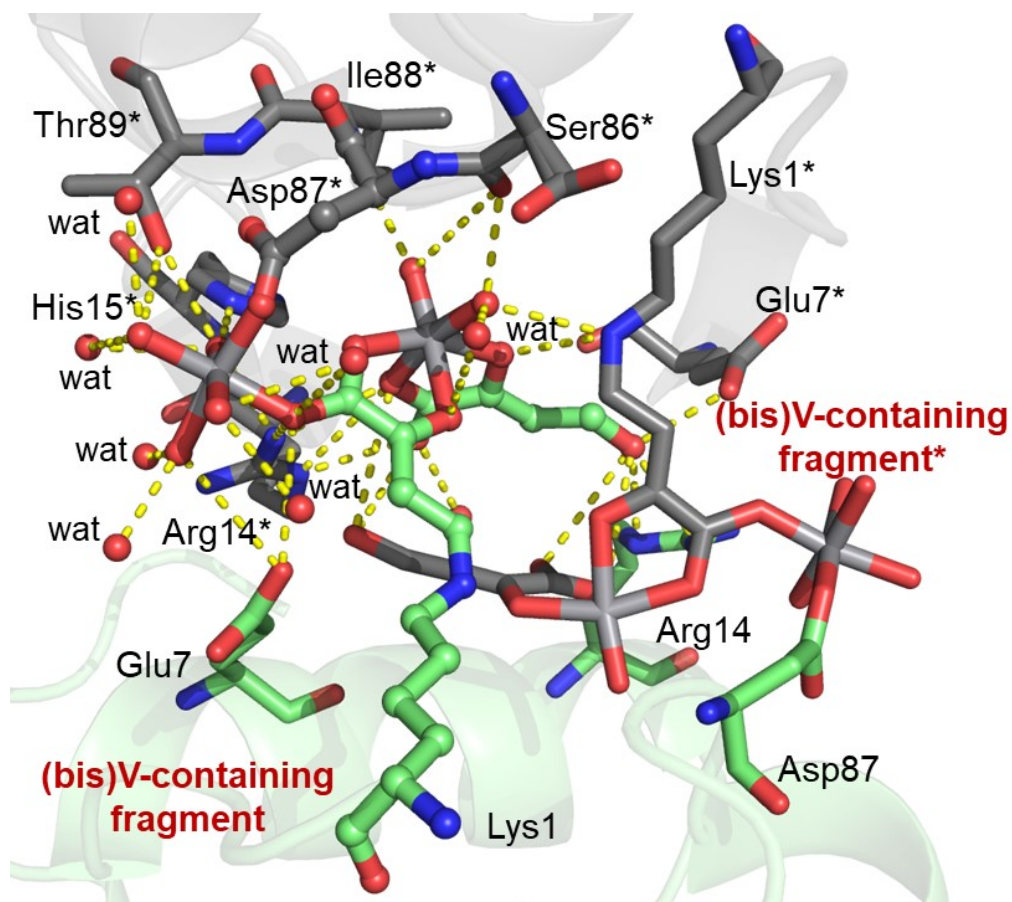

**Figure S2** Interaction of the (bis)V-containing fragment bound to the side chain of Lys1. Atoms from a symmetry related molecule are highlighted with the asterisk (\*) and coloured in grey. The side chain of Ser86\* adopts two different conformations.

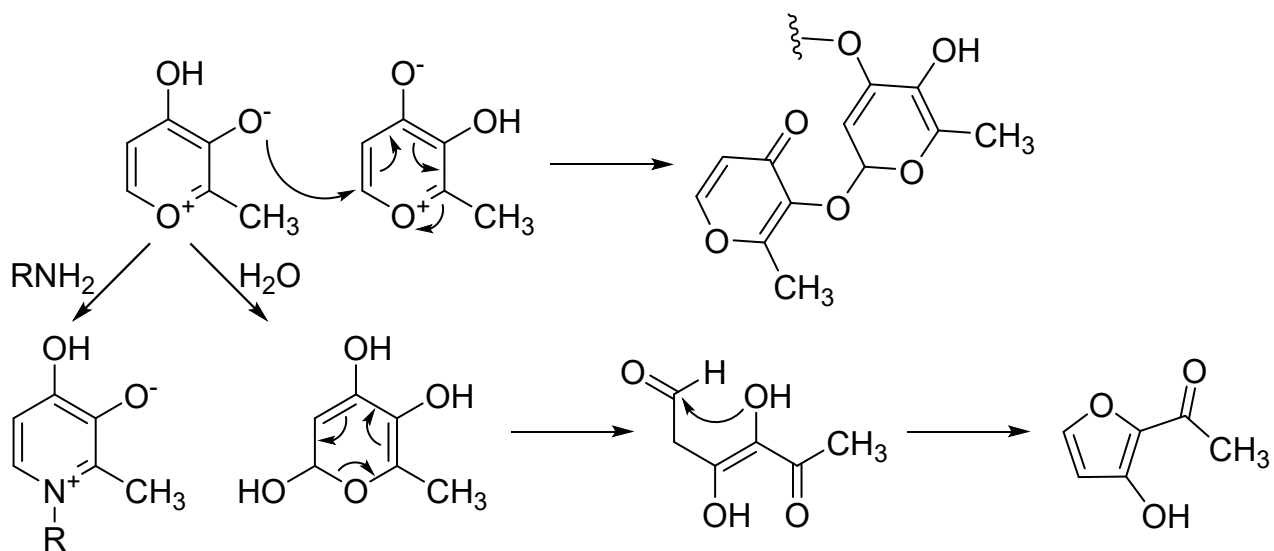

Figure S3 Proposed reactions of pyrylium ions.<sup>1</sup>

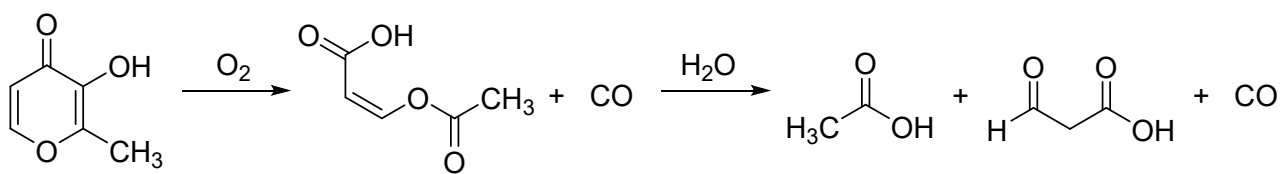

**Figure S4** Maltol cleavage by diketone cleaving enzyme via molecular oxygen and subsequent hydrolytic decomposition of the products.<sup>2</sup>

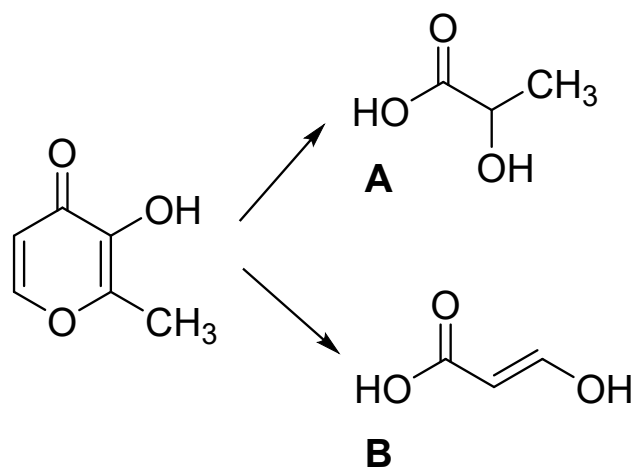

**Figure S5** Oxidation products of maltol: A) lactic acid and B) 3-hydroxyacrylic acid.<sup>3</sup>

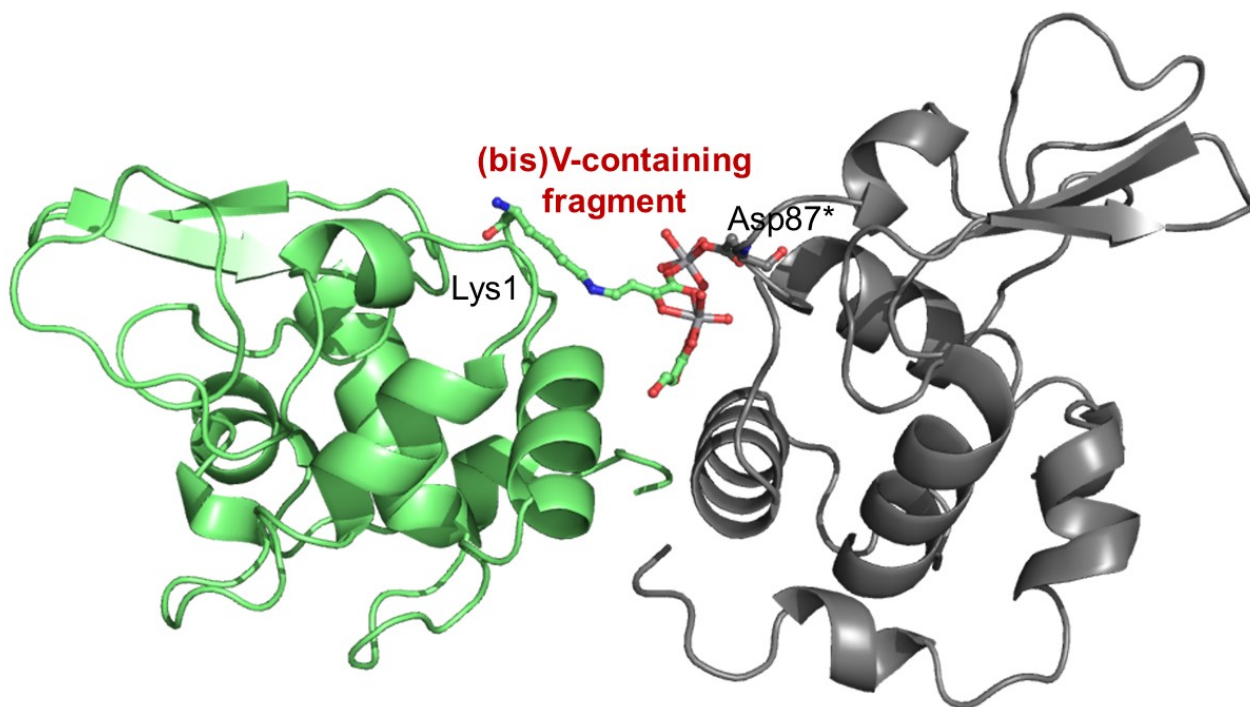

**Figure S6** Structure of the cross-linked HEWL dimer formed in the crystals of the protein exposed to BMOV. The symmetry related molecule is coloured in grey. Asp87 from the symmetry-related molecule is highlighted with the asterisk (\*).

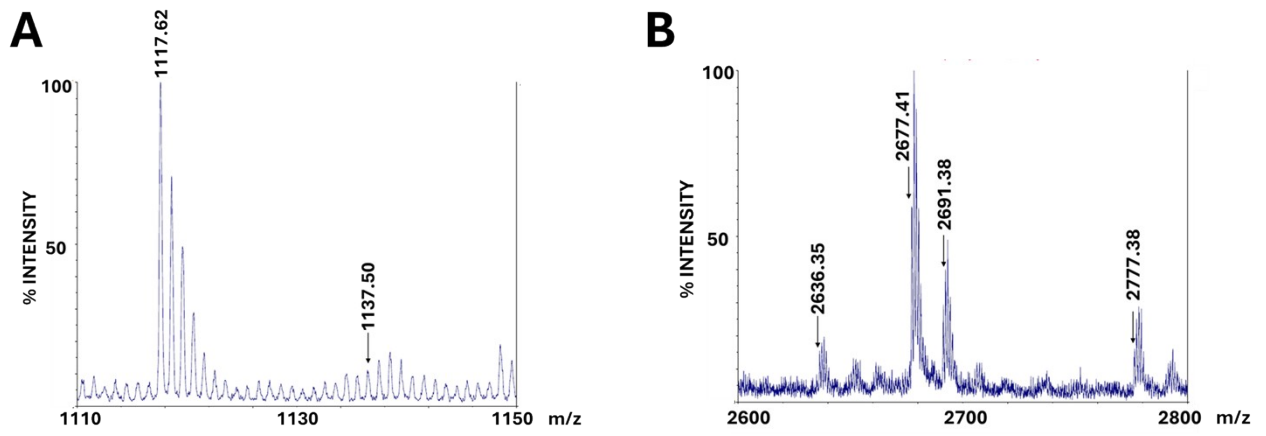

**Figure S7** MALDI MS spectra of the peptide mixture obtained from *in situ* hydrolysis of non-metalated HEWL (band 1.1 in Figure 4 of the main text): magnification of 1110-1150 (A) and 2600-2800 (B) m/z ranges.



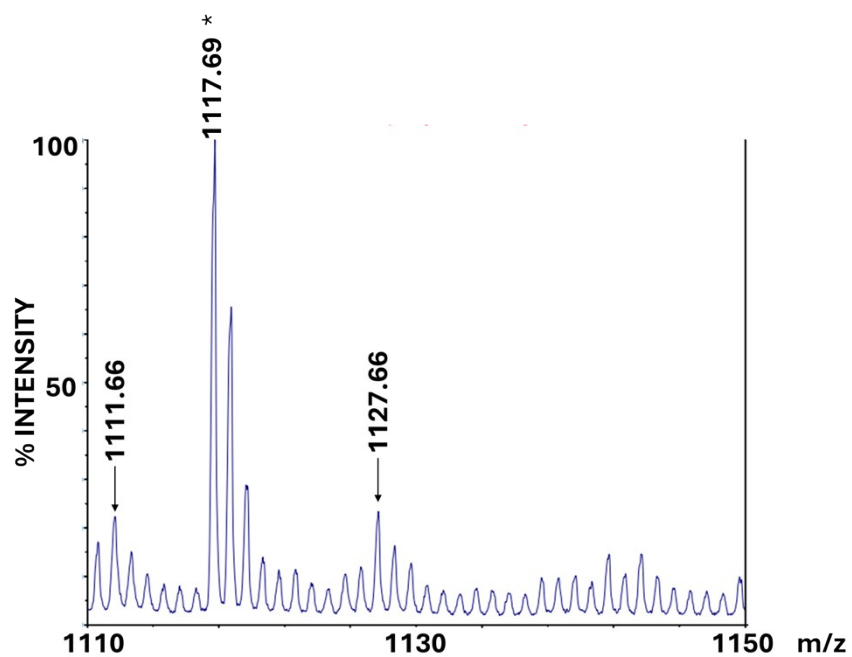

**Figure S8** MALDI MS spectra of the peptide mixture obtained from *in situ* hydrolysis of cross-linked HEWL dimer (band 2.1 in Figure 4 of the main text): magnification of 1110-1150 m/z range. The signals present in the reference (not metalated HEWL, band 1.1 in Figure 4 of the main text) are marked with asterisks (\*).

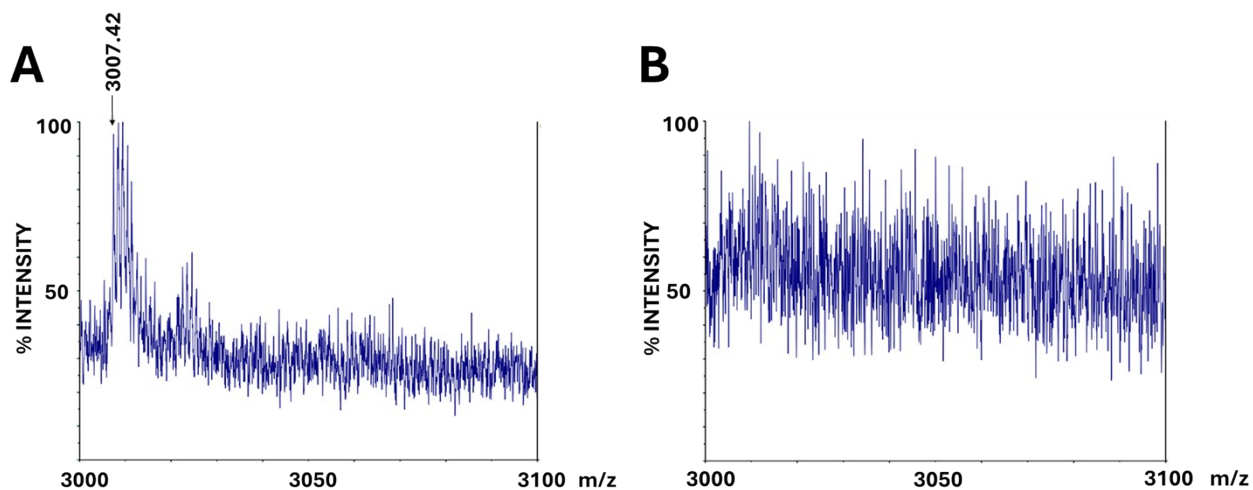

**Figure S9** MALDI MS spectra of the peptide mixture obtained from *in situ* hydrolysis of metalated monomeric HEWL (band 2.2 in Figure 4 of the main text) (A) and cross-linked HEWL dimer (band 2.1 in Figure 4 of the main text) (B): magnification of 3000-3100 m/z range.

**Table S1** Data collection and refinement statistics.

| <b>Data collection</b>                                                             |                                             |
|------------------------------------------------------------------------------------|---------------------------------------------|
| PDB code                                                                           | 9FMY                                        |
| Crystallization condition                                                          | 1.1 M NaCl<br>0.1M sodium acetate at pH 4.0 |
| Soaking time                                                                       | 21 days                                     |
| Space group                                                                        | P4 <sub>3</sub> 2 <sub>1</sub> 2            |
| a (Å)                                                                              | 78.11                                       |
| b (Å)                                                                              | 78.11                                       |
| c (Å)                                                                              | 37.21                                       |
| α/β/γ (°)                                                                          | 90.0/90.0/90.0                              |
| Molecules for asymmetric unit                                                      | 1                                           |
| Resolution range (Å)                                                               | 55.23-1.09 (1.11-1.09)                      |
| Observations                                                                       | 1112770 (44263)                             |
| Unique reflections                                                                 | 48619 (2359)                                |
| Completeness (%)                                                                   | 99.9 (99.1)                                 |
| Redundancy                                                                         | 22.9 (18.8)                                 |
| Rmerge (%)                                                                         | 0.056 (1.455)                               |
| Average I/σ(I)                                                                     | 29.0 (2.2)                                  |
| CC <sub>1/2</sub>                                                                  | 0.999 (0.822)                               |
| Anom. completeness (%)                                                             | 100.0 (99.5)                                |
| Anom. Multiplicity                                                                 | 12.1 (9.7)                                  |
| <b>Refinement</b>                                                                  |                                             |
| Resolution (Å)                                                                     | 55.23-1.09                                  |
| N° reflections                                                                     | 45192                                       |
| N° reflections in working set                                                      | 2841                                        |
| Rfactor/Rfree                                                                      | 0.129/0.152                                 |
| N° non-H atoms in the refinement                                                   | 1272                                        |
| B-factor overall (Å <sup>2</sup> )                                                 | 19.11                                       |
| Estimated occupancy of V (1)                                                       | 0.30                                        |
| Estimated occupancy of V (2)                                                       | 0.60                                        |
| Estimated occupancy of [VO(H <sub>2</sub> O) <sub>5</sub> ] <sup>2+</sup>          | 0.50                                        |
| Estimated occupancy of (bis)V-containing fragment                                  | 0.60                                        |
| B-factor of V (1) (Å <sup>2</sup> )                                                | 27.47                                       |
| B-factor of V (2) (Å <sup>2</sup> )                                                | 33.43                                       |
| B-factor of V [VO(H <sub>2</sub> O) <sub>5</sub> ] <sup>2+</sup> (Å <sup>2</sup> ) | 22.86                                       |
| B-factor of (bis)V-containing fragment (Å <sup>2</sup> )                           | 15.4±2.7                                    |
| <b>Ramachandran values (%)</b>                                                     |                                             |
| Most favoured/Additional allowed                                                   | 96.52/3.48                                  |
| Outliers                                                                           | 0.00                                        |
| <b>R.m.s.d. from ideality</b>                                                      |                                             |
| R.m.s.d. bonds (Å)                                                                 | 1111                                        |
| R.m.s.d. angles (°)                                                                | 1515                                        |

**Table S2** Anomalous difference electron density peaks interpreted as V centers.

| <b>Assignment</b>                             | <b>Occupancy of the V center<br/>in the model</b> | <b>Anomalous difference e.d. map<br/>peaks <math>\sigma</math> level</b> |
|-----------------------------------------------|---------------------------------------------------|--------------------------------------------------------------------------|
| V (1) of bis(V)-containing fragment           | 0.60                                              | 21.96                                                                    |
| V (2) of bis(V)-containing fragment           | 0.60                                              | 16.90                                                                    |
| V (1)                                         | 0.30                                              | 8.31                                                                     |
| V (2)                                         | 0.60                                              | 4.61                                                                     |
| V of $[\text{VO}(\text{H}_2\text{O})_5]^{2+}$ | 0.50                                              | 11.23                                                                    |

**Table S3** Specific m/z of signals recorded in MALDI-MS and ESI-LC-MSMS analysis of metalated monomeric HEWL (band 2.2 of SDS-PAGE reported in Figure 4 of the main text) and of cross-linked HEWL dimer (band 2.1 of SDS-PAGE reported in Figure 4 of the main text). Signals are due to peptide mixtures deriving from hydrolysis with Asp-N protease followed by trypsin. Expected Molecular Weight (MW, Da) values are also

| Experimental m/z (MALDI-MS) - <b>Metalated monomeric HEWL</b> | Experimental m/z (ESI-LCMSMS) - <b>Metalated monomeric HEWL</b> | Experimental m/z (MALDI-MS) - <b>Cross-linked HEWL dimer</b> | Experimental m/z (ESI-LCMSMS) - <b>Cross-linked HEWL dimer</b> | Expected MW (Da) | Interpretation                                                  |
|---------------------------------------------------------------|-----------------------------------------------------------------|--------------------------------------------------------------|----------------------------------------------------------------|------------------|-----------------------------------------------------------------|
| 1111.61                                                       | 555.76                                                          | 1111.66                                                      | –                                                              | 1110.39          | [62-68] + V + V=O                                               |
| 1127.60                                                       | –                                                               | 1127.66                                                      | –                                                              | 1126.39          | [62-68] + 2V=O                                                  |
| 2699.31                                                       | –                                                               | –                                                            | –                                                              | 2699.28          | [74-97] K <sub>96</sub> Ac, (Na <sup>+</sup> )                  |
| 2713.43                                                       | –                                                               | –                                                            | –                                                              | 2713.28          | [74-97] K <sub>96</sub> Ac (C-propionamide), (Na <sup>+</sup> ) |
| 2742.37                                                       | 1371.70,<br>915.10                                              | –                                                            | –                                                              | 2744.28          | [74-97] K <sub>96</sub> Ac + V=O                                |
| 2756.36                                                       | -                                                               | –                                                            | –                                                              | 2575.28          | [74-97] K <sub>96</sub> Ac (C-propionamide) + V=O               |
| 2776.35                                                       | 1389.14,<br>926.43                                              | –                                                            | –                                                              | 2776.35          | [22-45] K <sub>33</sub> Ac                                      |
| -                                                             | -                                                               | 4974.19                                                      | -                                                              | 4974.22          | [1-17] + [74-96] + (bis)V-containing fragment + VO <sub>3</sub> |

reported.

## Notes and references

1 V. A. Yaylayan and S. Mandeville, *J. Agric. Food Chem.*, 1994, **42**, 771–775.

2 C. M. L. Di Giuro, D. Buongiorno, E. Leitner and G. D. Straganz, *J. Inorg. Biochem.*, 2011, **105**, 1204–1211.

3 C. Kanzler, P. T. Haase, H. Schestkowa and L. W. Kroh, *J. Agric. Food Chem.*, 2016, **64**, 7829–7837.
